# Supplementary material
Source: PubMed Central journal article supplement (PMC4554821)

# (a) Absolute Spectral Density Mass Univariate Contrasts

## 7 vs. 9 year olds

## 7 vs. 10 year olds

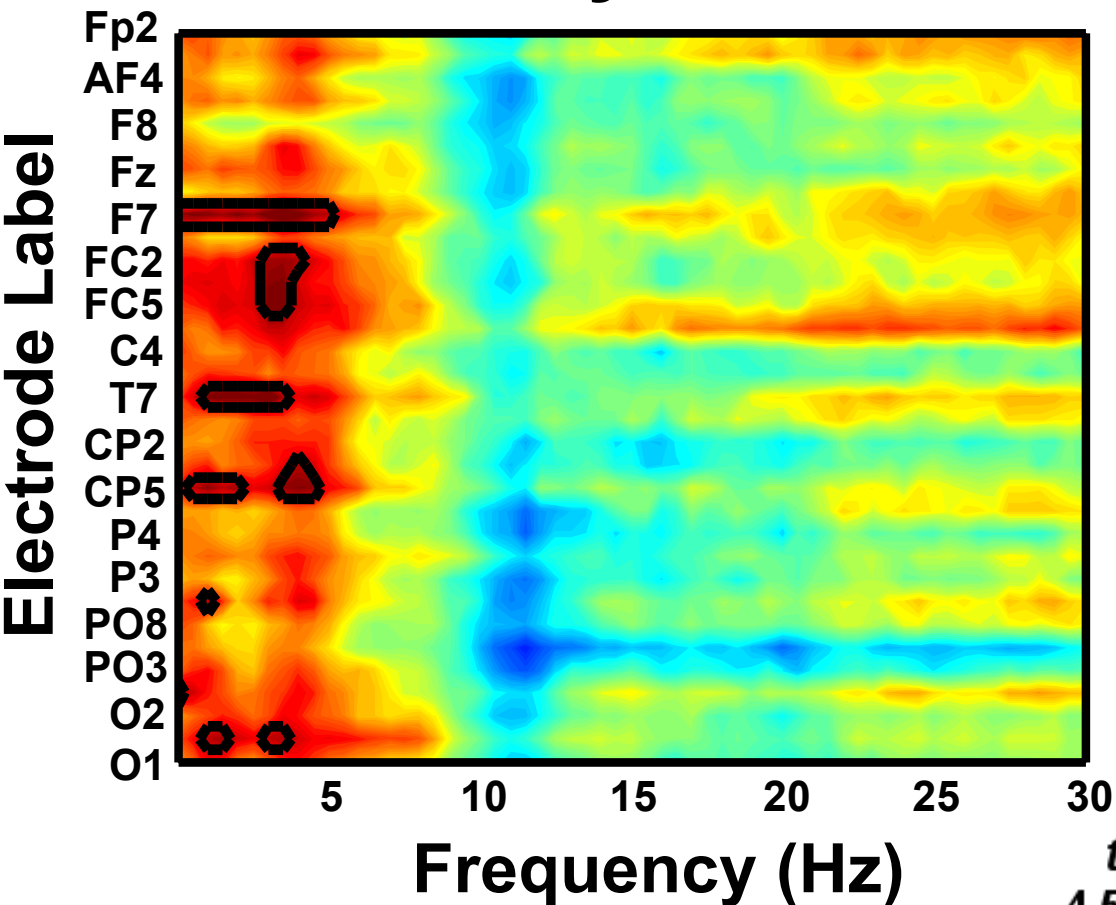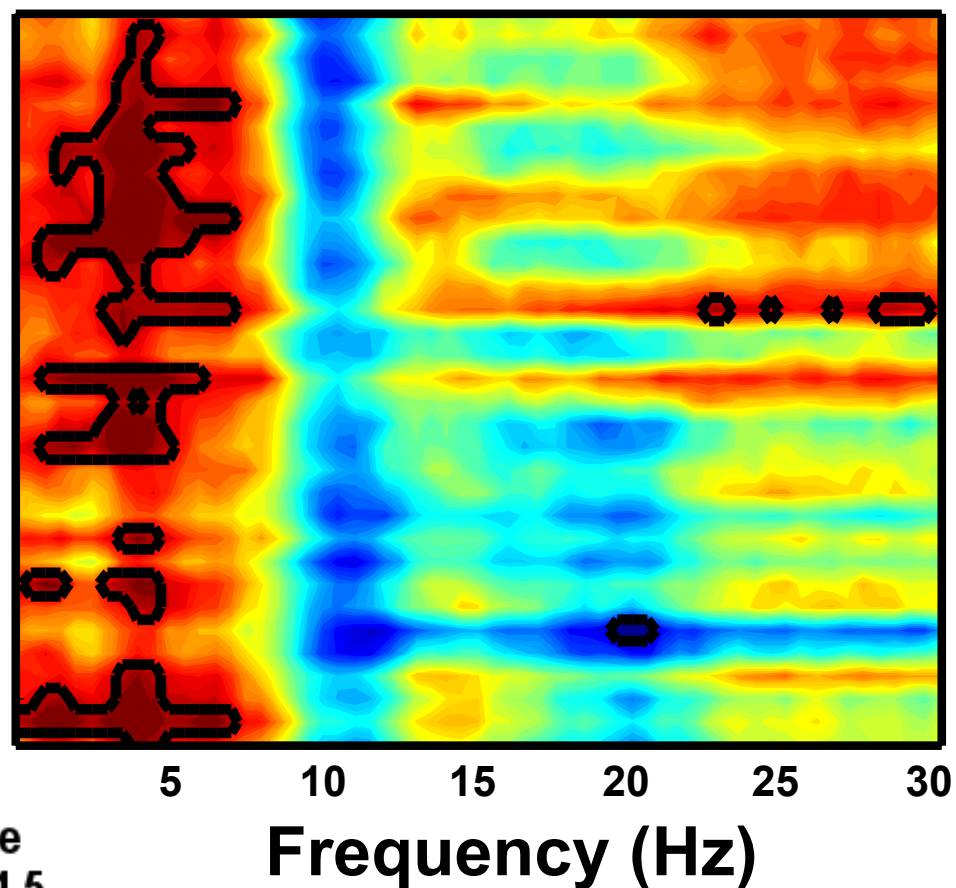

# (b) Relative Spectral Density Mass Univariate Contrasts

## 7 vs. 9 year olds

## 7 vs. 10 year olds

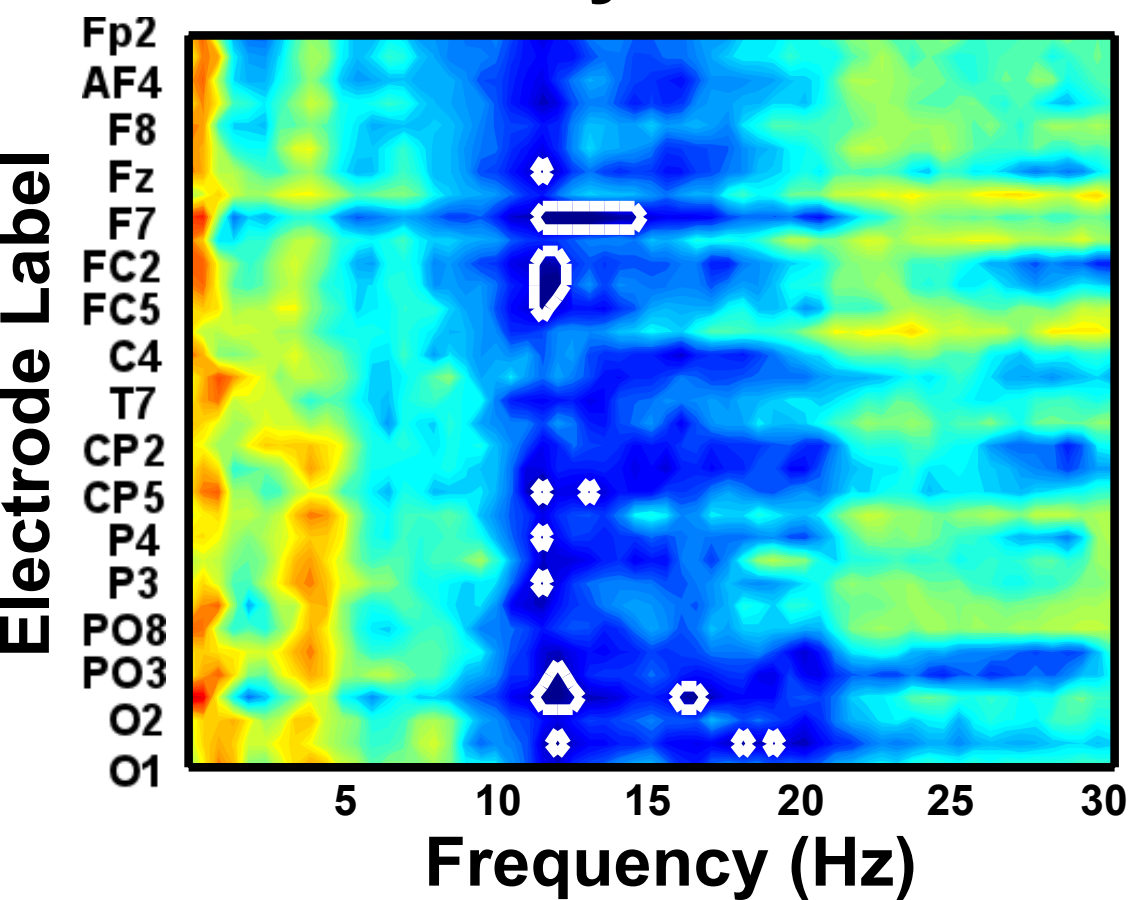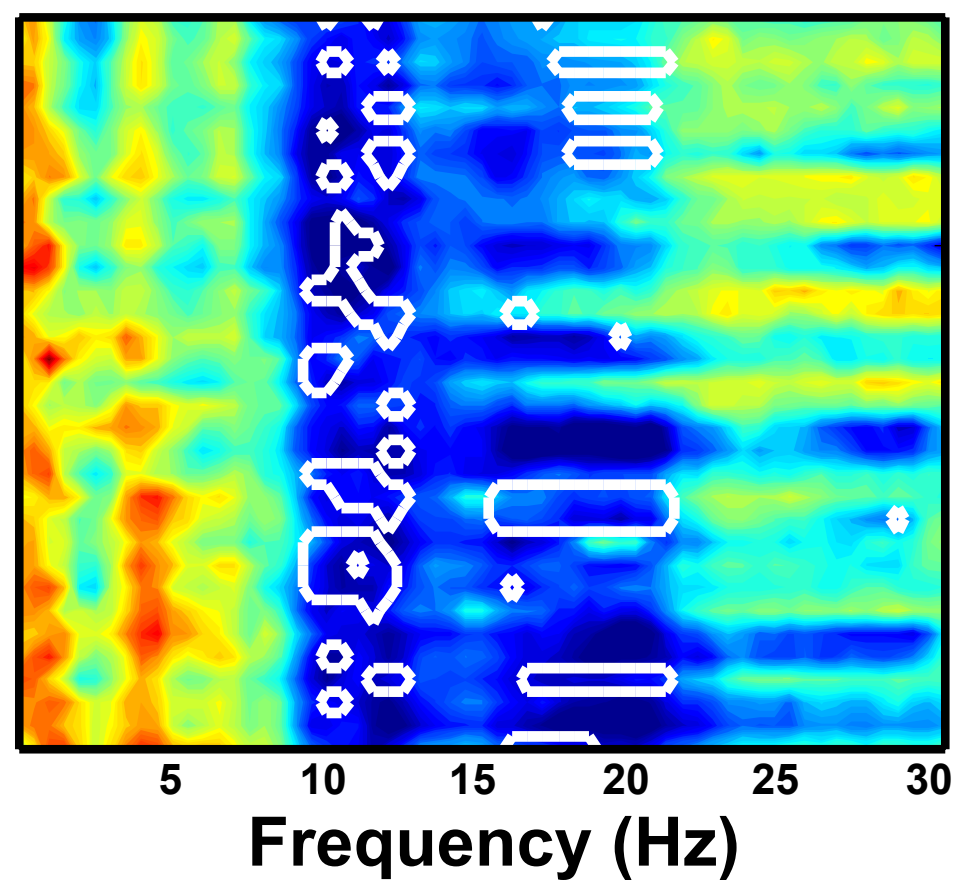

Supplement: NIHMS698426-supplement.pdf [file NIHMS698426-supplement.pdf]
